# Supplementary material for: Aspergillus Sydowii Marine Fungal Bloom in Australian Coastal Waters, Its Metabolites and Potential Impact on Symbiodinium Dinoflagellates
Source: PubMed Central journal article supplement (PMC4810073; doi:10.3390/md14030059), 2016-03-16
Supplement: marinedrugs-14-00059-s001.pdf [file marinedrugs-14-00059-s001.pdf]

# Supplementary Materials: *Aspergillus Sydowii* Marine Fungal Bloom in Australian Coastal Waters, Its Metabolites and Potential Impact on *Symbiodinium* Dinoflagellates

Aiko Hayashi <sup>1</sup>, Andrew Crombie <sup>2</sup>, Ernest Lacey <sup>2</sup>, Anthony J. Richardson <sup>3,4</sup>, Daniel Vuong <sup>2</sup>, Andrew M. Piggott <sup>5</sup> and Gustaaf Hallegraef <sup>1,\*</sup>

Table S1. *A. sydowii* isolates examined in this study.

| ID                | Source                                   | Location                    |
|-------------------|------------------------------------------|-----------------------------|
| FRR34             | Wheat or flour sample                    | Not available               |
| FRR2972           | Dried fish; <i>Puntius javanicus</i>     | Kalibaru, Indonesia         |
| FRR2991           | Dried fish; <i>Sardinella fimbriata</i>  | Bogor, Indonesia            |
| FRR4822           | Partially dried sultana grapes           | Mildura, VIC                |
| FRR5068           | Air, wardroom duct                       | Naval vessel                |
| FRR5136           | Water bath with ethylene glycol          | Maribyrnong, VIC            |
| FRR5152           | Water bath with ethylene glycol additive | Maribyrnong, VIC            |
| ASBS <sup>1</sup> | CPR silk after dust storm in 2009        | Between Brisbane and Sydney |
| FK1               | Diseased <i>Gorgonia ventalina</i>       | Key West, Florida           |

<sup>1</sup> defined as the original *A. sydowii* culture isolated in 2009.

Table S2. HPLC/DAD profile of *A. sydowii* FRR5068.

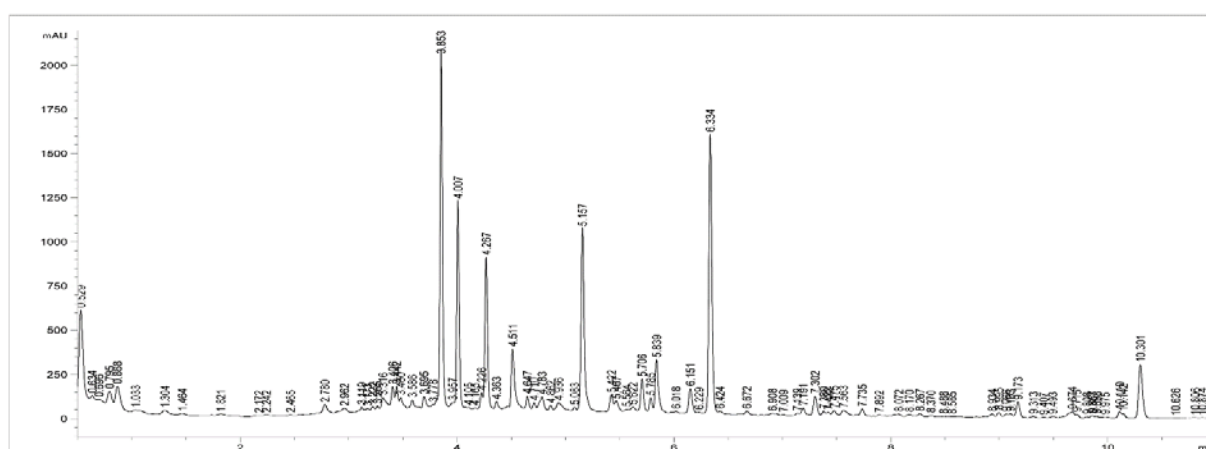

| Peak Number | Ret. Time | Area  | % Area | Cumulative % Area | Peak Number | Ret. Time | Area  | % Area | Cumulative % Area |
|-------------|-----------|-------|--------|-------------------|-------------|-----------|-------|--------|-------------------|
| 1           | 0.53      | 1,273 | 6.61   | 6.61              | 45          | 5.62      | 40    | 0.21   | 66.61             |
| 2           | 0.63      | 34    | 0.17   | 6.78              | 46          | 5.71      | 331   | 1.72   | 68.33             |
| 3           | 0.70      | 21    | 0.11   | 6.89              | 47          | 5.79      | 99    | 0.51   | 68.84             |
| 4           | 0.79      | 157   | 0.82   | 7.71              | 48          | 5.84      | 542   | 2.81   | 71.65             |
| 5           | 0.87      | 290   | 1.51   | 9.21              | 49          | 6.02      | 15    | 0.08   | 71.73             |
| 6           | 1.03      | 76    | 0.39   | 9.61              | 50          | 6.15      | 306   | 1.59   | 73.32             |
| 7           | 1.30      | 91    | 0.47   | 10.08             | 51          | 6.23      | 5     | 0.03   | 73.35             |
| 8           | 1.46      | 31    | 0.16   | 10.24             | 52          | 6.33      | 3,078 | 15.97  | 89.32             |
| 9           | 1.82      | 34    | 0.18   | 10.42             | 53          | 6.42      | 14    | 0.07   | 89.39             |
| 10          | 2.17      | 7     | 0.03   | 10.45             | 54          | 6.67      | 68    | 0.35   | 89.75             |
| 11          | 2.24      | 11    | 0.06   | 10.51             | 55          | 6.91      | 8     | 0.04   | 89.79             |
| 12          | 2.46      | 8     | 0.04   | 10.55             | 56          | 7.01      | 8     | 0.04   | 89.83             |
| 13          | 2.78      | 161   | 0.84   | 11.39             | 57          | 7.14      | 9     | 0.05   | 89.88             |

|    |      |       |       |       |    |       |     |      |       |
|----|------|-------|-------|-------|----|-------|-----|------|-------|
| 14 | 2.96 | 98    | 0.51  | 11.89 | 58 | 7.19  | 64  | 0.33 | 90.21 |
| 15 | 3.12 | 27    | 0.14  | 12.04 | 59 | 7.30  | 236 | 1.22 | 91.43 |
| 16 | 3.17 | 8     | 0.04  | 12.08 | 60 | 7.38  | 21  | 0.11 | 91.54 |
| 17 | 3.22 | 21    | 0.11  | 12.19 | 61 | 7.42  | 10  | 0.05 | 91.59 |
| 18 | 3.26 | 18    | 0.09  | 12.28 | 62 | 7.48  | 38  | 0.20 | 91.79 |
| 19 | 3.32 | 131   | 0.68  | 12.96 | 63 | 7.56  | 88  | 0.46 | 92.25 |
| 20 | 3.41 | 98    | 0.51  | 13.47 | 64 | 7.73  | 73  | 0.38 | 92.63 |
| 21 | 3.44 | 85    | 0.44  | 13.90 | 65 | 7.89  | 8   | 0.04 | 92.67 |
| 22 | 3.48 | 36    | 0.19  | 14.09 | 66 | 8.07  | 39  | 0.20 | 92.87 |
| 23 | 3.59 | 98    | 0.51  | 14.60 | 67 | 8.17  | 16  | 0.09 | 92.96 |
| 24 | 3.69 | 124   | 0.64  | 15.24 | 68 | 8.27  | 27  | 0.14 | 93.10 |
| 25 | 3.78 | 6     | 0.03  | 15.27 | 69 | 8.37  | 17  | 0.09 | 93.19 |
| 26 | 3.85 | 3,143 | 16.31 | 31.58 | 70 | 8.49  | 7   | 0.04 | 93.22 |
| 27 | 3.96 | 12    | 0.06  | 31.64 | 71 | 8.56  | 7   | 0.04 | 93.26 |
| 28 | 4.01 | 1,760 | 9.13  | 40.77 | 72 | 8.93  | 30  | 0.16 | 93.42 |
| 29 | 4.11 | 6     | 0.03  | 40.80 | 73 | 9.00  | 39  | 0.20 | 93.62 |
| 30 | 4.17 | 9     | 0.05  | 40.85 | 74 | 9.07  | 9   | 0.05 | 93.67 |
| 31 | 4.23 | 51    | 0.26  | 41.11 | 75 | 9.10  | 9   | 0.05 | 93.71 |
| 32 | 4.27 | 1,324 | 6.87  | 47.98 | 76 | 9.17  | 170 | 0.88 | 94.60 |
| 33 | 4.36 | 68    | 0.35  | 48.34 | 77 | 9.31  | 20  | 0.11 | 94.70 |
| 34 | 4.51 | 701   | 3.64  | 51.97 | 78 | 9.41  | 6   | 0.03 | 94.74 |
| 35 | 4.65 | 111   | 0.58  | 52.55 | 79 | 9.49  | 19  | 0.10 | 94.83 |
| 36 | 4.71 | 44    | 0.23  | 52.78 | 80 | 9.67  | 75  | 0.39 | 95.22 |
| 37 | 4.78 | 172   | 0.89  | 53.67 | 81 | 9.72  | 12  | 0.06 | 95.28 |
| 38 | 4.86 | 35    | 0.18  | 53.86 | 82 | 9.81  | 7   | 0.04 | 95.31 |
| 39 | 4.94 | 144   | 0.75  | 54.60 | 83 | 9.86  | 12  | 0.06 | 95.37 |
| 40 | 5.08 | 21    | 0.11  | 54.71 | 84 | 9.90  | 6   | 0.03 | 95.40 |
| 41 | 5.16 | 2,072 | 10.75 | 65.47 | 85 | 9.97  | 11  | 0.06 | 95.46 |
| 42 | 5.42 | 119   | 0.62  | 66.09 | 86 | 10.11 | 33  | 0.17 | 95.63 |
| 43 | 5.47 | 53    | 0.27  | 66.36 | 87 | 10.14 | 9   | 0.05 | 95.68 |
| 44 | 5.56 | 9     | 0.04  | 66.40 | 88 | 10.30 | 779 | 4.04 | 99.72 |

Table S3. HPLC/DAD profile of *A. sydowii* ASBS.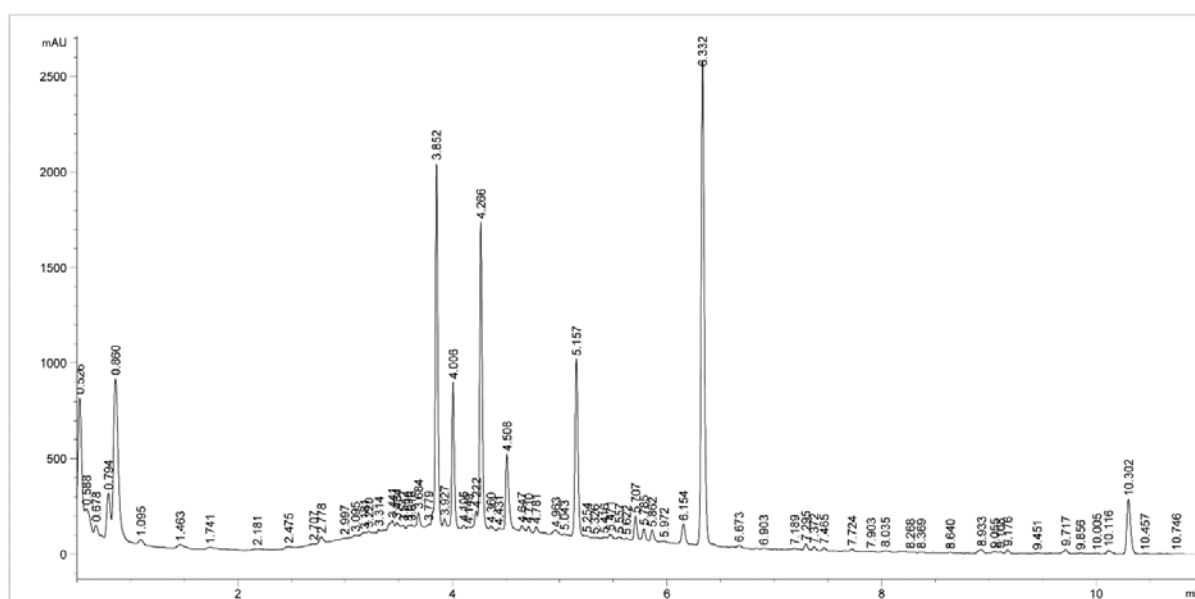

| Peak Number | Ret. Time | Area  | % Area | Cumulative % Area | Peak Number | Ret. Time | Area  | % Area | Cumulative % Area |
|-------------|-----------|-------|--------|-------------------|-------------|-----------|-------|--------|-------------------|
| 1           | 0.53      | 1,309 | 6.09   | 6.09              | 40          | 5.16      | 1,710 | 7.96   | 66.25             |
| 2           | 0.59      | 111   | 0.51   | 6.61              | 41          | 5.25      | 6     | 0.03   | 66.27             |
| 3           | 0.68      | 83    | 0.39   | 7.00              | 42          | 5.33      | 9     | 0.04   | 66.32             |

|    |      |       |       |       |    |       |       |       |        |
|----|------|-------|-------|-------|----|-------|-------|-------|--------|
| 4  | 0.79 | 343   | 1.60  | 8.59  | 43 | 5.42  | 10    | 0.05  | 66.36  |
| 5  | 0.86 | 2,109 | 9.82  | 18.41 | 44 | 5.47  | 40    | 0.19  | 66.55  |
| 6  | 1.09 | 65    | 0.30  | 18.71 | 45 | 5.56  | 25    | 0.12  | 66.67  |
| 7  | 1.46 | 88    | 0.41  | 19.12 | 46 | 5.62  | 9     | 0.04  | 66.71  |
| 8  | 1.74 | 68    | 0.31  | 19.44 | 47 | 5.71  | 212   | 0.99  | 67.70  |
| 9  | 2.19 | 32    | 0.15  | 19.59 | 48 | 5.79  | 104   | 0.48  | 68.18  |
| 10 | 2.48 | 32    | 0.15  | 19.74 | 49 | 5.86  | 114   | 0.53  | 68.71  |
| 11 | 2.71 | 6     | 0.03  | 19.76 | 50 | 5.97  | 19    | 0.09  | 68.80  |
| 12 | 2.78 | 79    | 0.37  | 20.13 | 51 | 6.15  | 233   | 1.08  | 69.88  |
| 13 | 3.00 | 12    | 0.06  | 20.19 | 52 | 6.33  | 5,152 | 23.98 | 93.86  |
| 14 | 3.09 | 17    | 0.08  | 20.27 | 53 | 6.67  | 63    | 0.30  | 94.16  |
| 15 | 3.18 | 13    | 0.06  | 20.33 | 54 | 6.90  | 11    | 0.05  | 94.21  |
| 16 | 3.22 | 10    | 0.05  | 20.38 | 55 | 7.19  | 13    | 0.06  | 94.27  |
| 17 | 3.31 | 14    | 0.07  | 20.44 | 56 | 7.30  | 60    | 0.28  | 94.55  |
| 18 | 3.44 | 99    | 0.46  | 20.90 | 57 | 7.37  | 33    | 0.15  | 94.70  |
| 19 | 3.48 | 29    | 0.14  | 21.04 | 58 | 7.46  | 31    | 0.14  | 94.85  |
| 20 | 3.54 | 17    | 0.08  | 21.12 | 59 | 7.72  | 23    | 0.11  | 94.95  |
| 21 | 3.59 | 9     | 0.04  | 21.16 | 60 | 7.90  | 9     | 0.04  | 94.99  |
| 22 | 3.62 | 9     | 0.04  | 21.20 | 61 | 8.03  | 30    | 0.14  | 95.13  |
| 23 | 3.68 | 129   | 0.60  | 21.80 | 62 | 8.27  | 6     | 0.03  | 95.16  |
| 24 | 3.78 | 7     | 0.03  | 21.83 | 63 | 8.37  | 7     | 0.03  | 95.19  |
| 25 | 3.85 | 2,966 | 13.81 | 35.64 | 64 | 8.64  | 16    | 0.07  | 95.27  |
| 26 | 3.93 | 54    | 0.25  | 35.89 | 65 | 8.93  | 62    | 0.29  | 95.55  |
| 27 | 4.01 | 1,177 | 5.48  | 41.37 | 66 | 9.05  | 12    | 0.06  | 95.61  |
| 28 | 4.11 | 25    | 0.12  | 41.49 | 67 | 9.11  | 8     | 0.04  | 95.65  |
| 29 | 4.15 | 8     | 0.04  | 41.53 | 68 | 9.18  | 38    | 0.18  | 95.83  |
| 30 | 4.22 | 50    | 0.23  | 41.76 | 69 | 9.45  | 8     | 0.04  | 95.86  |
| 31 | 4.27 | 2,482 | 11.55 | 53.31 | 70 | 9.72  | 62    | 0.29  | 96.15  |
| 32 | 4.36 | 34    | 0.16  | 53.47 | 71 | 9.86  | 14    | 0.07  | 96.22  |
| 33 | 4.43 | 12    | 0.05  | 53.52 | 72 | 10.01 | 11    | 0.05  | 96.27  |
| 34 | 4.51 | 810   | 3.77  | 57.29 | 73 | 10.12 | 64    | 0.30  | 96.56  |
| 35 | 4.65 | 39    | 0.18  | 57.48 | 74 | 10.30 | 716   | 3.33  | 99.90  |
| 36 | 4.71 | 37    | 0.17  | 57.65 | 75 | 10.46 | 7     | 0.03  | 99.93  |
| 37 | 4.78 | 56    | 0.26  | 57.91 | 76 | 10.75 | 6     | 0.03  | 99.96  |
| 38 | 4.96 | 73    | 0.34  | 58.25 | 77 | 10.98 | 8     | 0.04  | 100.00 |
| 39 | 5.04 | 7     | 0.03  | 58.29 |    |       |       |       |        |

Table S4. HPLC/DAD profile of *A. sydowii* FK1.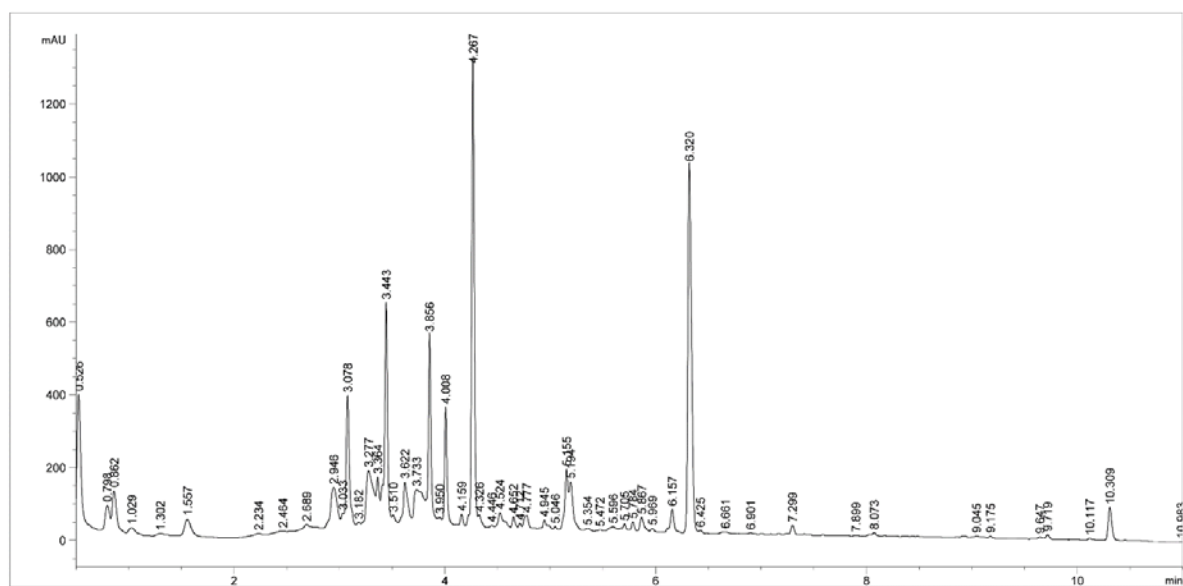

| Peak Number | Ret. Time | Area  | % Area | Cumulative % Area | Peak Number | Ret. Time | Area  | % Area | Cumulative % Area |
|-------------|-----------|-------|--------|-------------------|-------------|-----------|-------|--------|-------------------|
| 1           | 0.53      | 840   | 7.25   | 7.25              | 29          | 4.71      | 11    | 0.09   | 70.09             |
| 2           | 0.80      | 112   | 0.97   | 8.22              | 30          | 4.78      | 83    | 0.71   | 70.80             |
| 3           | 0.86      | 200   | 1.73   | 9.96              | 31          | 4.94      | 27    | 0.23   | 71.03             |
| 4           | 1.03      | 66    | 0.57   | 10.53             | 32          | 5.05      | 9     | 0.08   | 71.11             |
| 5           | 1.30      | 31    | 0.27   | 10.80             | 33          | 5.15      | 123   | 1.06   | 72.17             |
| 6           | 1.56      | 212   | 1.83   | 12.63             | 34          | 5.19      | 94    | 0.81   | 72.98             |
| 7           | 2.23      | 35    | 0.31   | 12.93             | 35          | 5.35      | 15    | 0.13   | 73.11             |
| 8           | 2.46      | 24    | 0.21   | 13.14             | 36          | 5.47      | 10    | 0.09   | 73.20             |
| 9           | 2.69      | 46    | 0.40   | 13.54             | 37          | 5.60      | 31    | 0.26   | 73.47             |
| 10          | 2.95      | 368   | 3.17   | 16.71             | 38          | 5.71      | 20    | 0.17   | 73.64             |
| 11          | 3.03      | 7     | 0.06   | 16.77             | 39          | 5.78      | 39    | 0.34   | 73.97             |
| 12          | 3.08      | 655   | 5.66   | 22.43             | 40          | 5.87      | 94    | 0.81   | 74.78             |
| 13          | 3.18      | 7     | 0.06   | 22.49             | 41          | 5.97      | 14    | 0.12   | 74.90             |
| 14          | 3.28      | 371   | 3.20   | 25.70             | 42          | 6.16      | 107   | 0.92   | 75.82             |
| 15          | 3.36      | 71    | 0.61   | 26.31             | 43          | 6.32      | 2,405 | 20.76  | 96.58             |
| 16          | 3.44      | 986   | 8.51   | 34.82             | 44          | 6.43      | 9     | 0.07   | 96.66             |
| 17          | 3.51      | 12    | 0.11   | 34.92             | 45          | 6.62      | 9     | 0.08   | 96.73             |
| 18          | 3.62      | 272   | 2.35   | 37.27             | 46          | 6.90      | 10    | 0.09   | 96.82             |
| 19          | 3.73      | 271   | 2.34   | 39.61             | 47          | 7.30      | 54    | 0.46   | 97.28             |
| 20          | 3.86      | 707   | 6.11   | 45.72             | 48          | 7.90      | 8     | 0.07   | 97.36             |
| 21          | 3.95      | 7     | 0.06   | 45.77             | 49          | 8.07      | 13    | 0.11   | 97.47             |
| 22          | 4.01      | 479   | 4.13   | 49.91             | 50          | 9.05      | 18    | 0.16   | 97.62             |
| 23          | 4.16      | 51    | 0.44   | 50.35             | 51          | 9.18      | 9     | 0.07   | 97.70             |
| 24          | 4.27      | 2,149 | 18.56  | 68.91             | 52          | 9.65      | 8     | 0.07   | 97.76             |
| 25          | 4.33      | 13    | 0.12   | 69.03             | 53          | 9.72      | 22    | 0.19   | 97.95             |
| 26          | 4.45      | 6     | 0.05   | 69.07             | 54          | 10.12     | 14    | 0.12   | 98.08             |
| 27          | 4.52      | 62    | 0.53   | 69.61             | 55          | 10.31     | 217   | 1.87   | 99.95             |
| 28          | 4.65      | 45    | 0.39   | 70.00             | 56          | 10.98     | 6     | 0.05   | 100.00            |

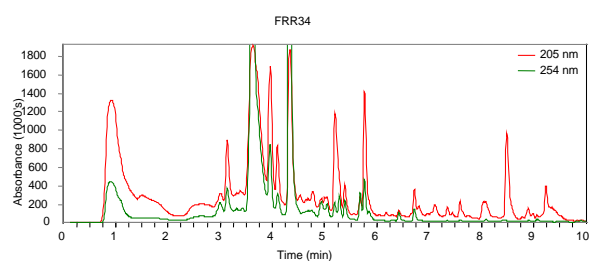

(A)

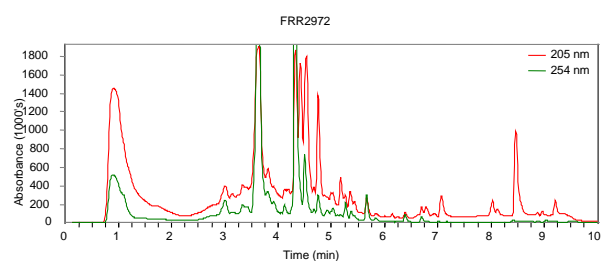

(B)

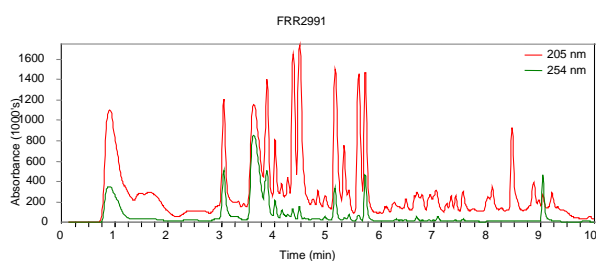

(C)

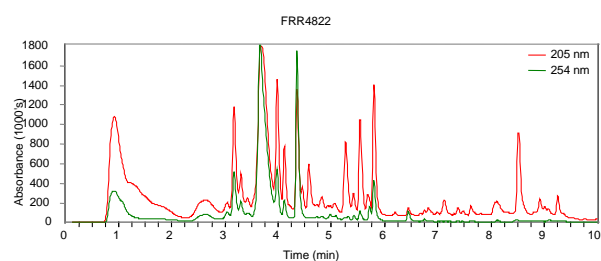

(D)

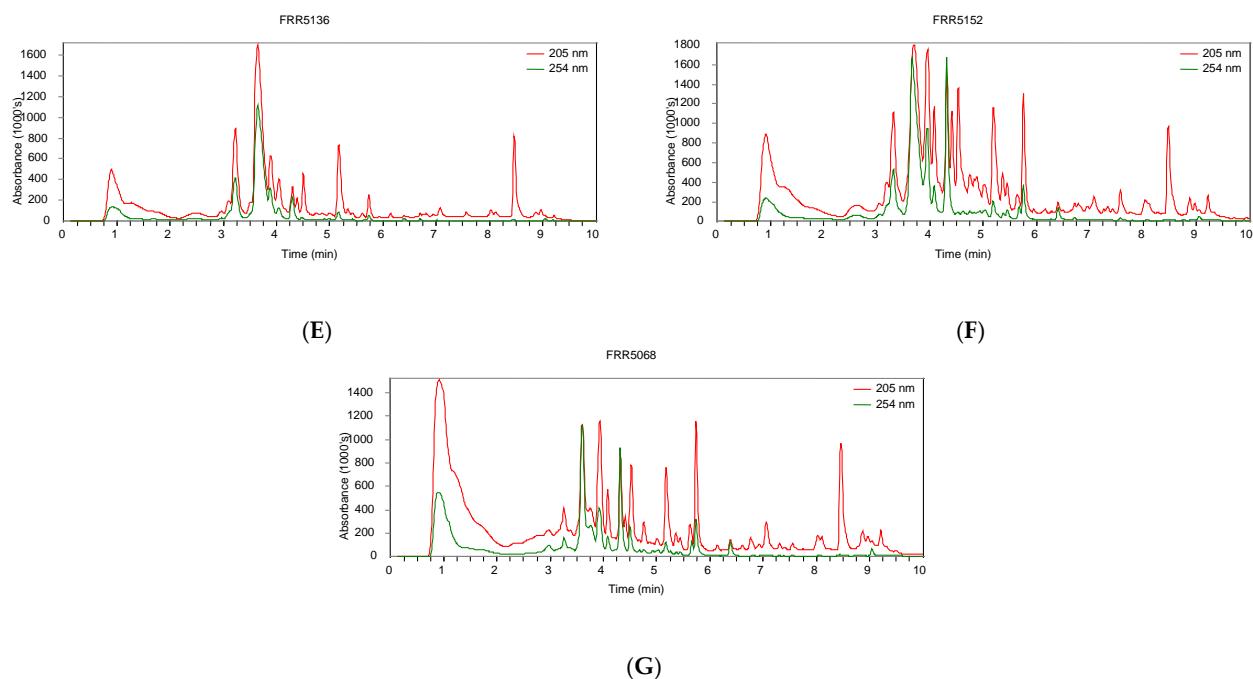

**Figure S1.** HPLC profiles of *A. sydowii* investigated in the present study. The strains were cultured on rice for 7 days extracted with methanol (1 gm/mL) and analysed by gradient HPLC, (conditioned as described in body of the article). A. FRR34; B. FRR2972; C. FRR2991; D. FRR4822; E. FRR5136; F. FRR5152 and G. FRR5068.

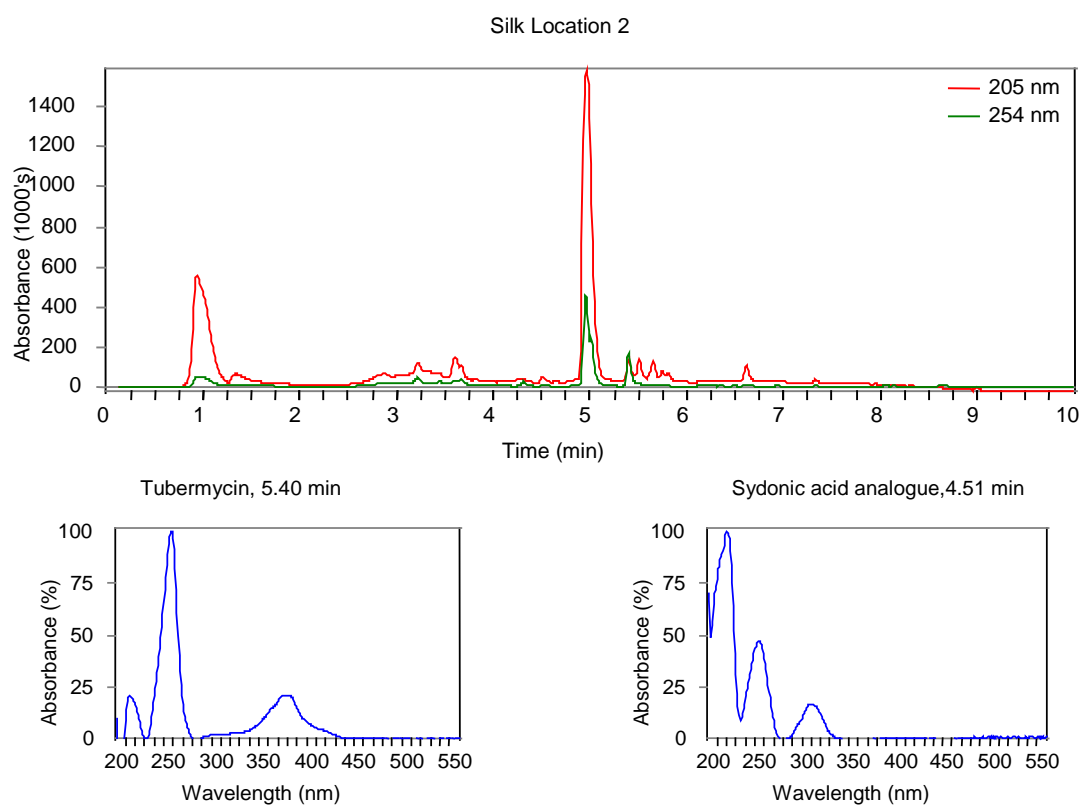

**(A)**

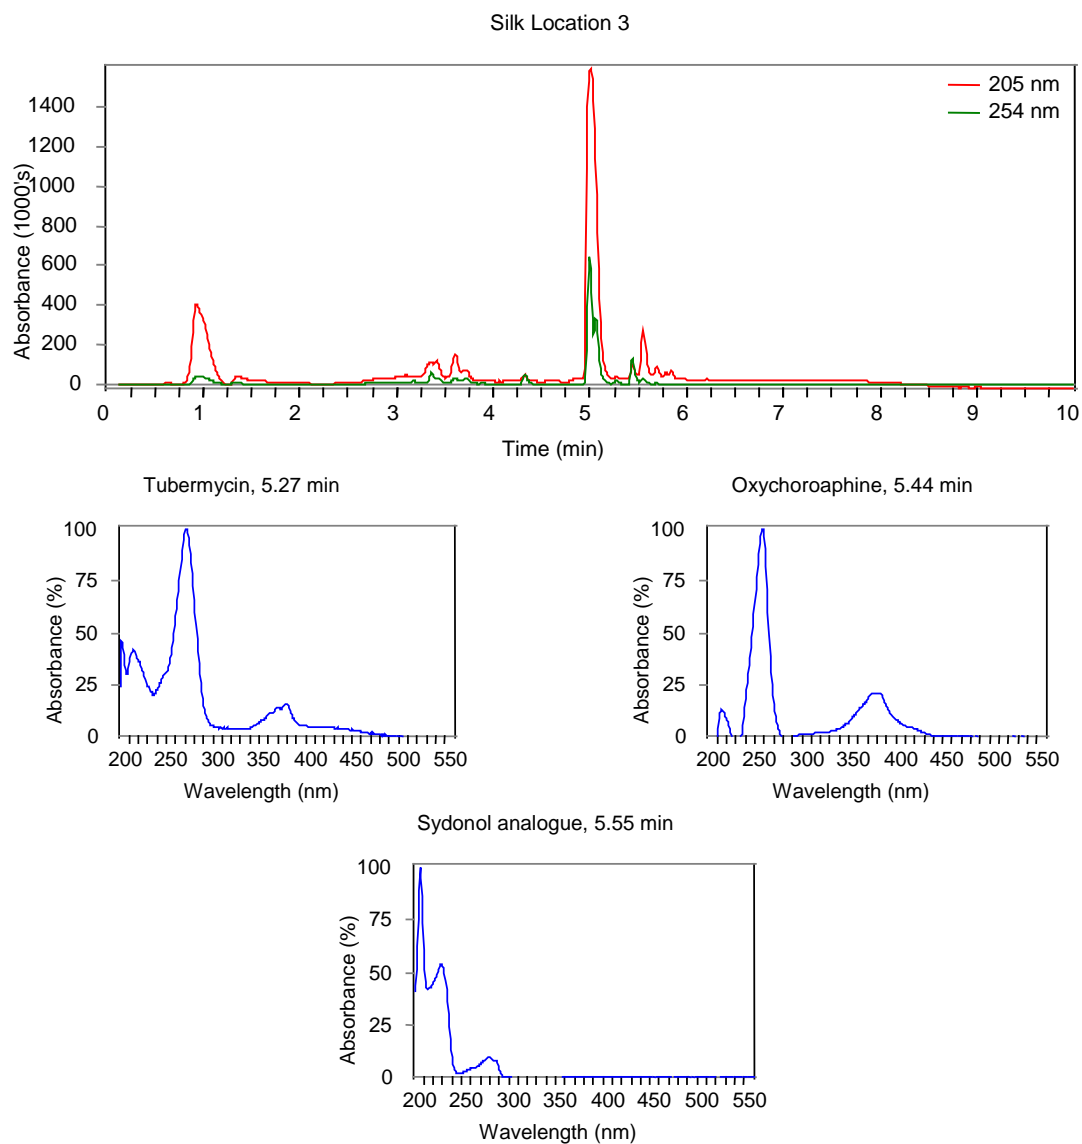

**Figure S2.** HPLC profiles of extracted silks from (A). location 2 and (B). location 3, with the UV spectra of the microbial metabolites in the extract. (Note: The dominant peak eluting at 5 min, is an artefact of extraction of the silks with methanol).
